# Supplementary material for: On-Line Visual Tracking with Occlusion Handling
Source: MDPI journal article supplement (doi:10.3390/s20030929), 2020-02-10
Supplement: s1 [file s1]

The provided supplementary files show the results of our algorithm applied to PETS2009-S2L1, TUDS-Stadtmitte, ETH Bahnhof and Sunnyday sequences. Following table lists example instances where our algorithm was able to recover the labels of the missed or occluded objects include:

| Dataset       | Assigned label | Last correct estimate | Start | End | Label recovered at |
|---------------|----------------|-----------------------|-------|-----|--------------------|
| PETS2009-S2L1 | 117,3 (M)      | 149                   | 150   | 156 | 157                |
| PETS2009-S2L1 | 1,3 (M)        | 107                   | 108   | 110 | 111                |
| PETS2009-S2L1 | 425,3 (M)      | 73                    | 474   | 484 | 385                |
| ETH Sunnyday  | 1,2 (M)        | 135                   | 136   | 143 | 144                |
| ETH Bahnhof   | 548,1 (ML)     | 611                   | 612   | 617 | 618                |
| ETH Bahnhof   | 605,3 (MR)     | 729                   | 730   | 738 | 739                |

(M), (ML) and (MR) refer to different areas of the image frame. These can be used to locate the target.

(M) - Both horizontally and vertically middle portion of the frame

(ML) - Vertically middle and horizontally left portion of the frame

(MR) - Vertically middle and horizontally right portion of the frame

Please note that this is not a comprehensive list and does not included all the instances where our algorithm was able to recover the labels of the miss-detected or occluded targets.

Also note that the ability of our algorithm to detect and remove false alarms cannot be demonstrated through these video sequences. Reader is directed to refer table 3 of the manuscript to observe how our proposed algorithm has handled the false alarms (in terms of FAF metric).
